# Supplementary material for: Pilot trial comparing COVID-19 publication database to conventional online search methods
Source: HighWire-hosted journal article supplement (doi:10.1136/bmjhci-2022-100616), 2022-11-01
Supplement: bmjhci-2022-100616supp001_data_supplement.pdf [file bmjhci-2022-100616supp001_data_supplement.pdf]

**Supplemental Table 1** Number of respondents collected in each group by sex

|        | Group A | Group B | Total |
|--------|---------|---------|-------|
| Male   | 1       | 1       | 2     |
| Female | 8       | 7       | 15    |
| Total  | 9       | 8       | 17    |

**Supplemental Table 2** Number of respondents collected from each group by major

|                                         | Group A | Group B | Total |
|-----------------------------------------|---------|---------|-------|
| Biology or Biochemistry                 | 3       | 3       | 6     |
| Dietetics, Nutrition, and Food Sciences | 6       | 5       | 11    |
| Total                                   | 9       | 8       | 17    |

**Supplemental Table 3** Number of respondents collected from each group by comfort using and reading research literature (research experience)

|               | Group A | Group B | Total |
|---------------|---------|---------|-------|
| Uncomfortable | 0       | 1       | 8     |
| Neutral       | 8       | 5       | 13    |
| Comfortable   | 1       | 2       | 3     |
| Total         | 9       | 8       | 17    |
